# Supplementary material
Source: Springer Nature journal article supplement (https://hal.science/hal-01806423v1/file/13059_2008_2216_MOESM14_ESM.pdf)
Supplement: MOESM14 [file 13059_2008_2216_MOESM14_ESM.pdf]

# Abiotic stresses

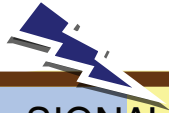

## SIGNALING

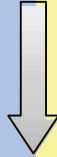

### PRIMARY METABOLISM

- Photosynthesis
- Carbohydrate metabolism
- Fatty acid synthesis
- Transcription
- Protein synthesis
- Nucleic acid synthesis

GROWTH

down-regulated

### Regulatory proteins

Transcription factors  
Protein kinases

Vesicular  
trafficking

### USE OF ENERGY STORES

- Lipid degradation (glyoxylate cycle)
- Autophagy
- Proteasome

### PROTECTANTS

- HSPs
- Chlorophyll binding proteins?
- Osmolytes:
  - Mannitol
  - Proline?
  - Urea?

up-regulated
